# Supplementary material for: Effect of Water–Ethanol Extraction as Pre-Treatment on the Adsorption Properties of Aloe vera Waste
Source: MDPI journal article supplement (doi:10.3390/ma15165566), 2022-08-13
Supplement: s1 [file s1]

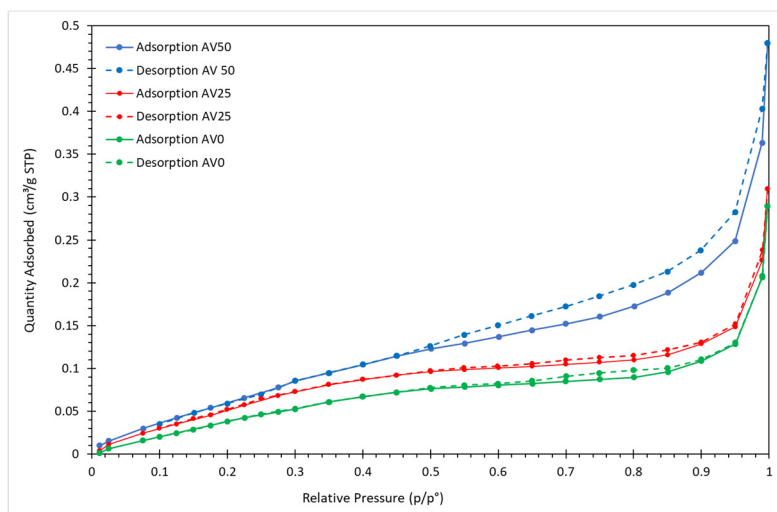

**Figure S1.** N<sub>2</sub> Adsorption Isotherms(for BET analysis).

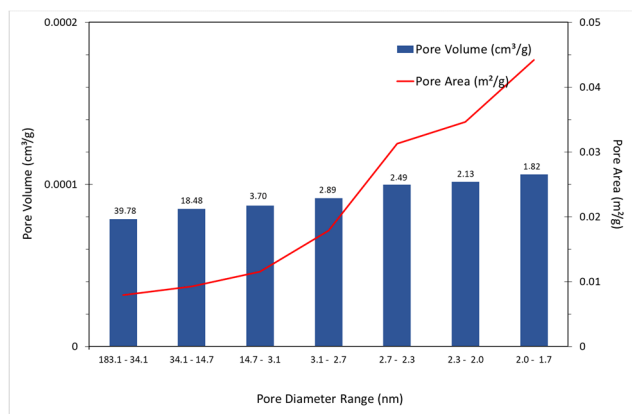

**(a) AV0**

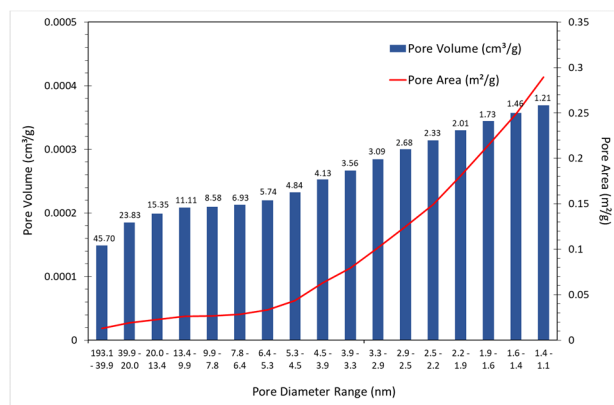

**(b) AV25**

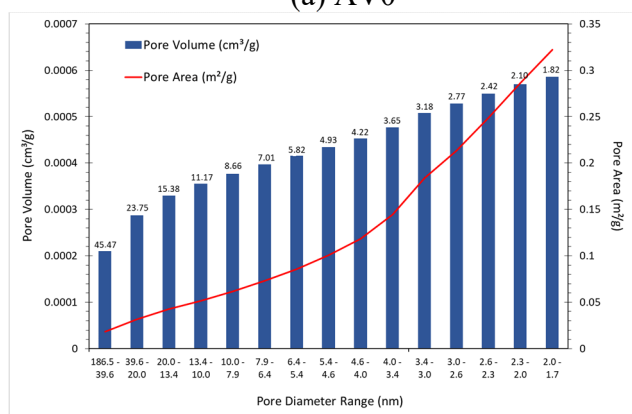

**(c) AV50**

**Figure S2.** Pore Volume Distribution.
